# Supplementary material for: METTL3 mediates SOX5 m6A methylation in bronchial epithelial cells to attenuate Th2 cell differentiation in T2 asthma
Source: PubMed Central journal article supplement — Heliyon. 2024 Apr 1;10(7):e28884. doi: 10.1016/j.heliyon.2024.e28884 (PMC11004579; doi:10.1016/j.heliyon.2024.e28884), 2024-04-01

Figure 4. Expression of METTL3 and SOX5 in T2 asthma

Mouse lung tissue

Figure 4 (B)

METTL3

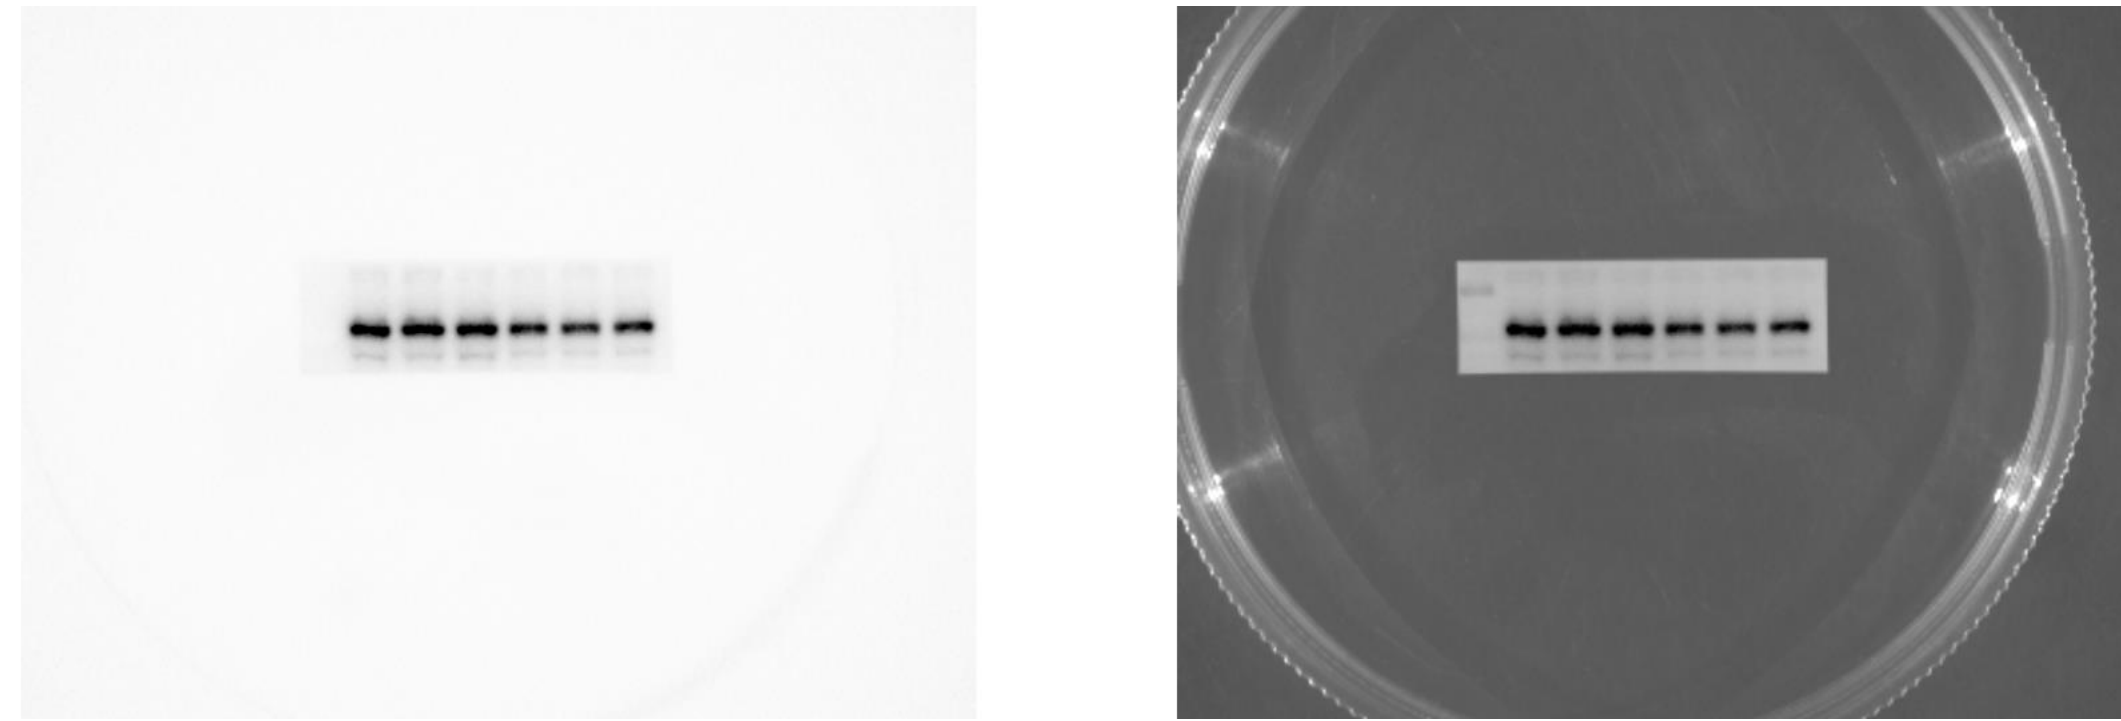

SOX5

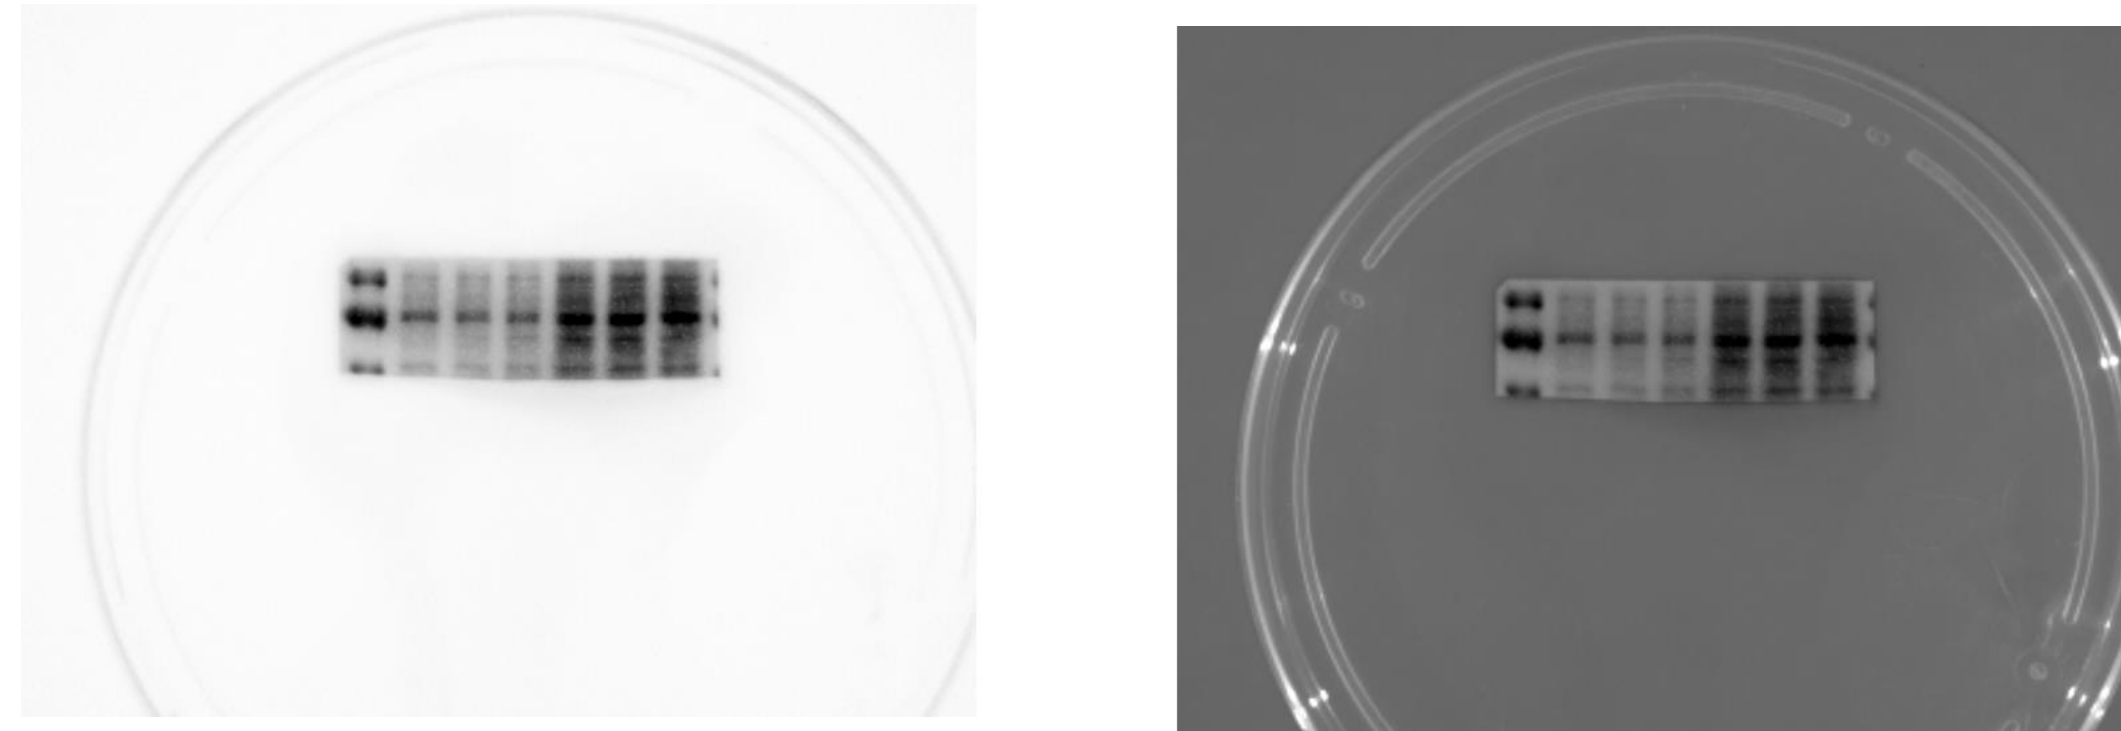

$\beta$ -actin

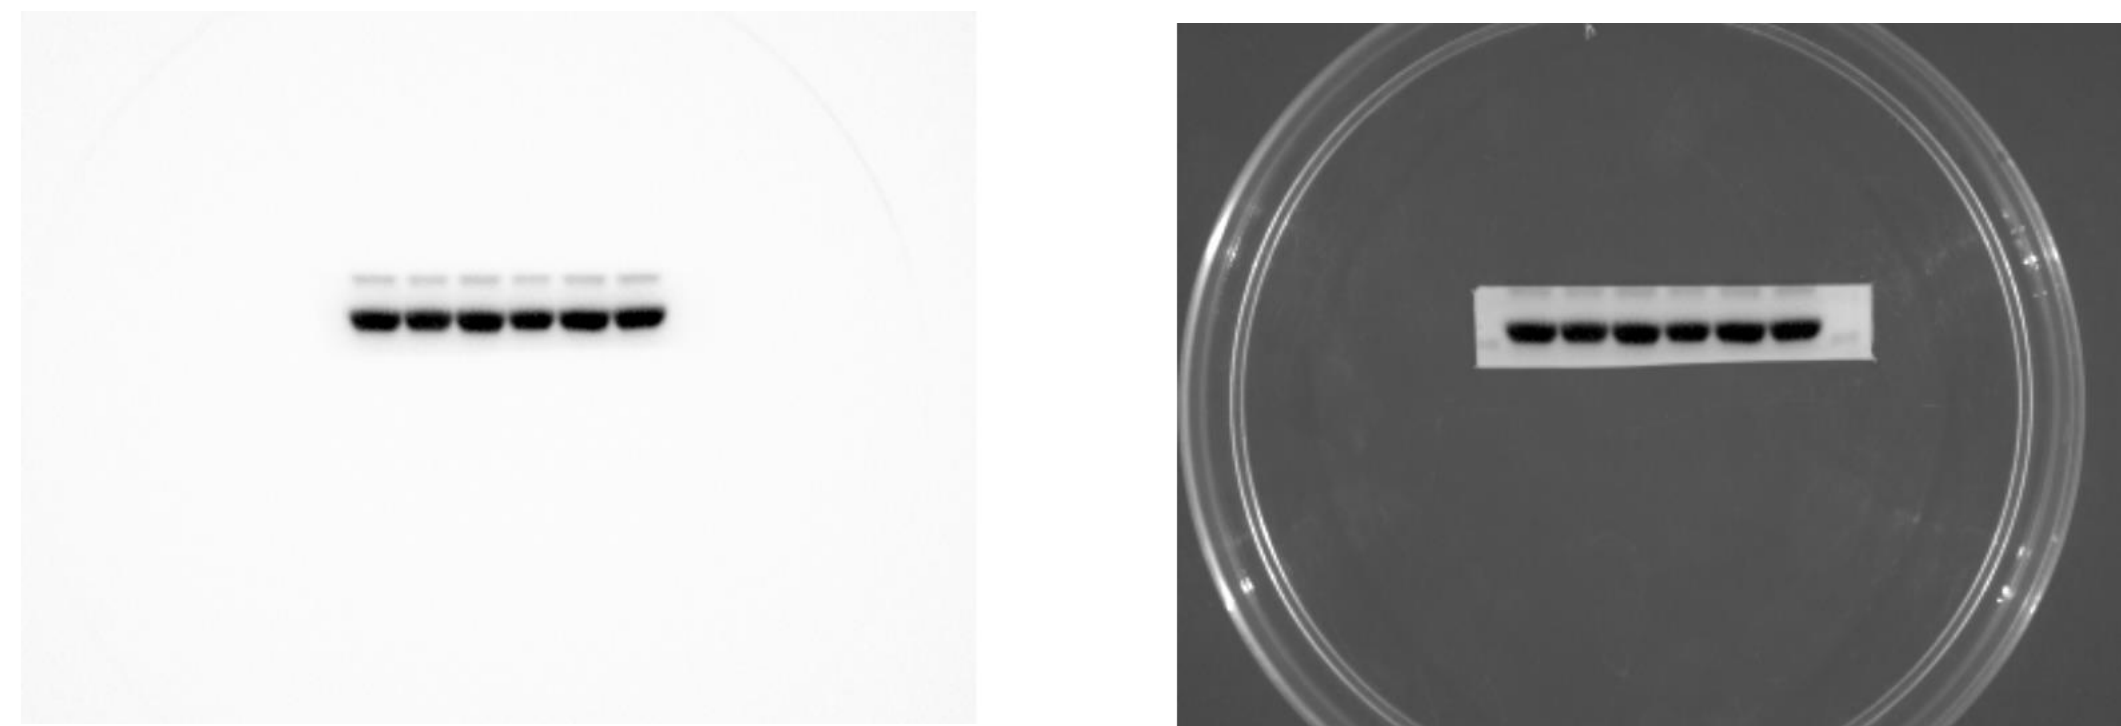

Human bronchial epithelial cells

Figure 4 (D)

METTL3

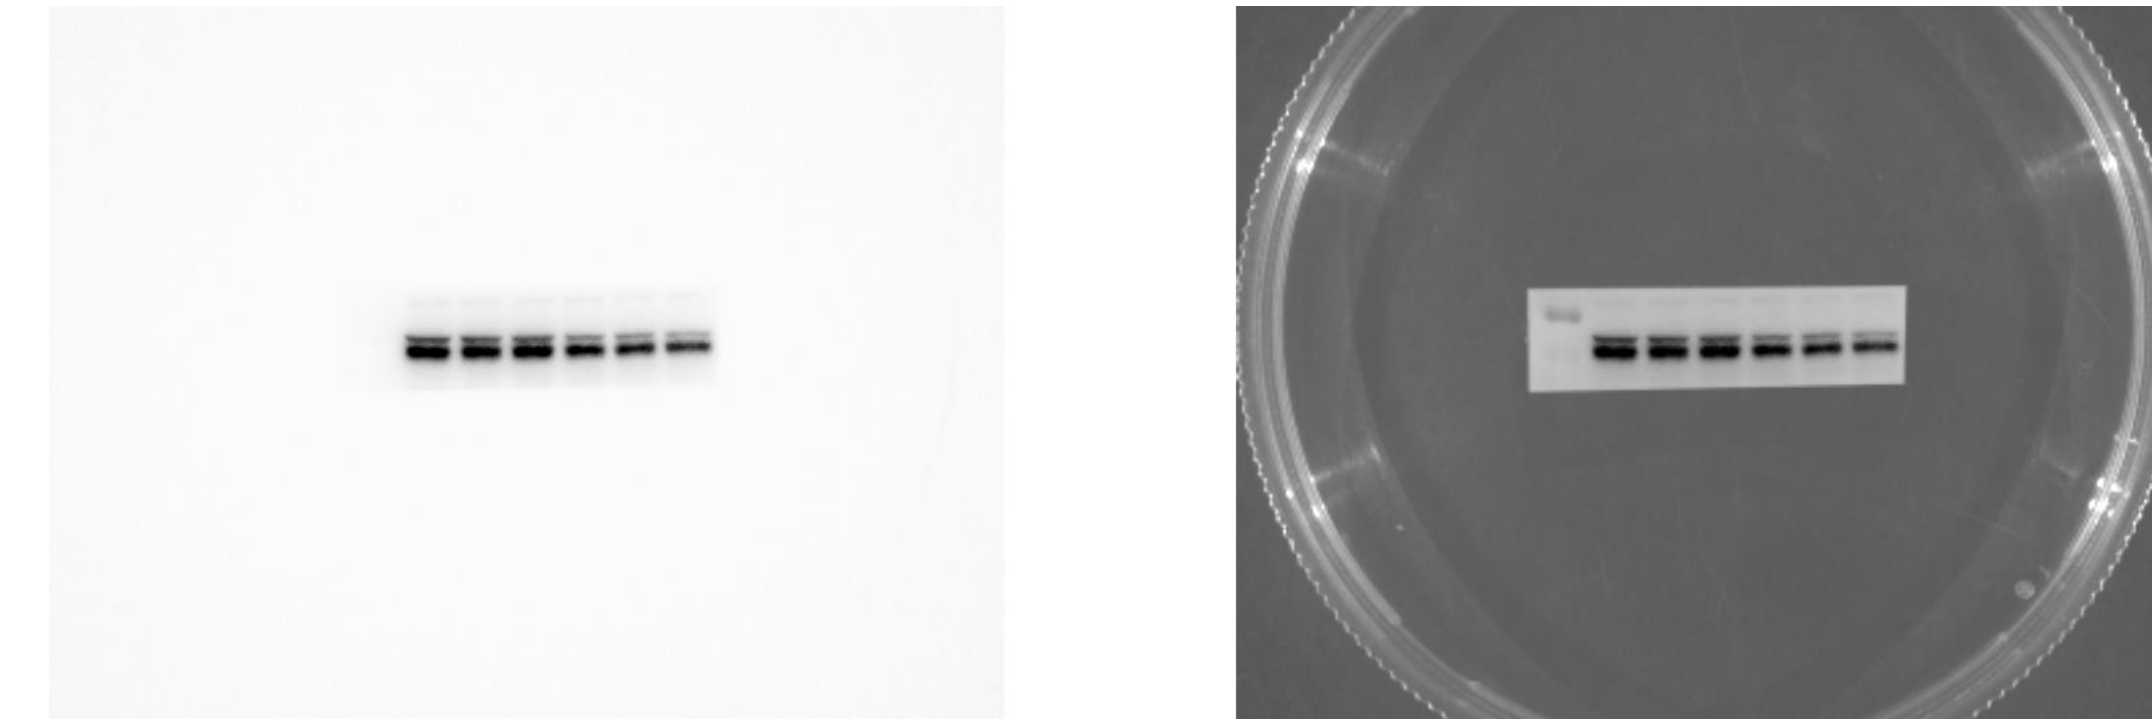

SOX5

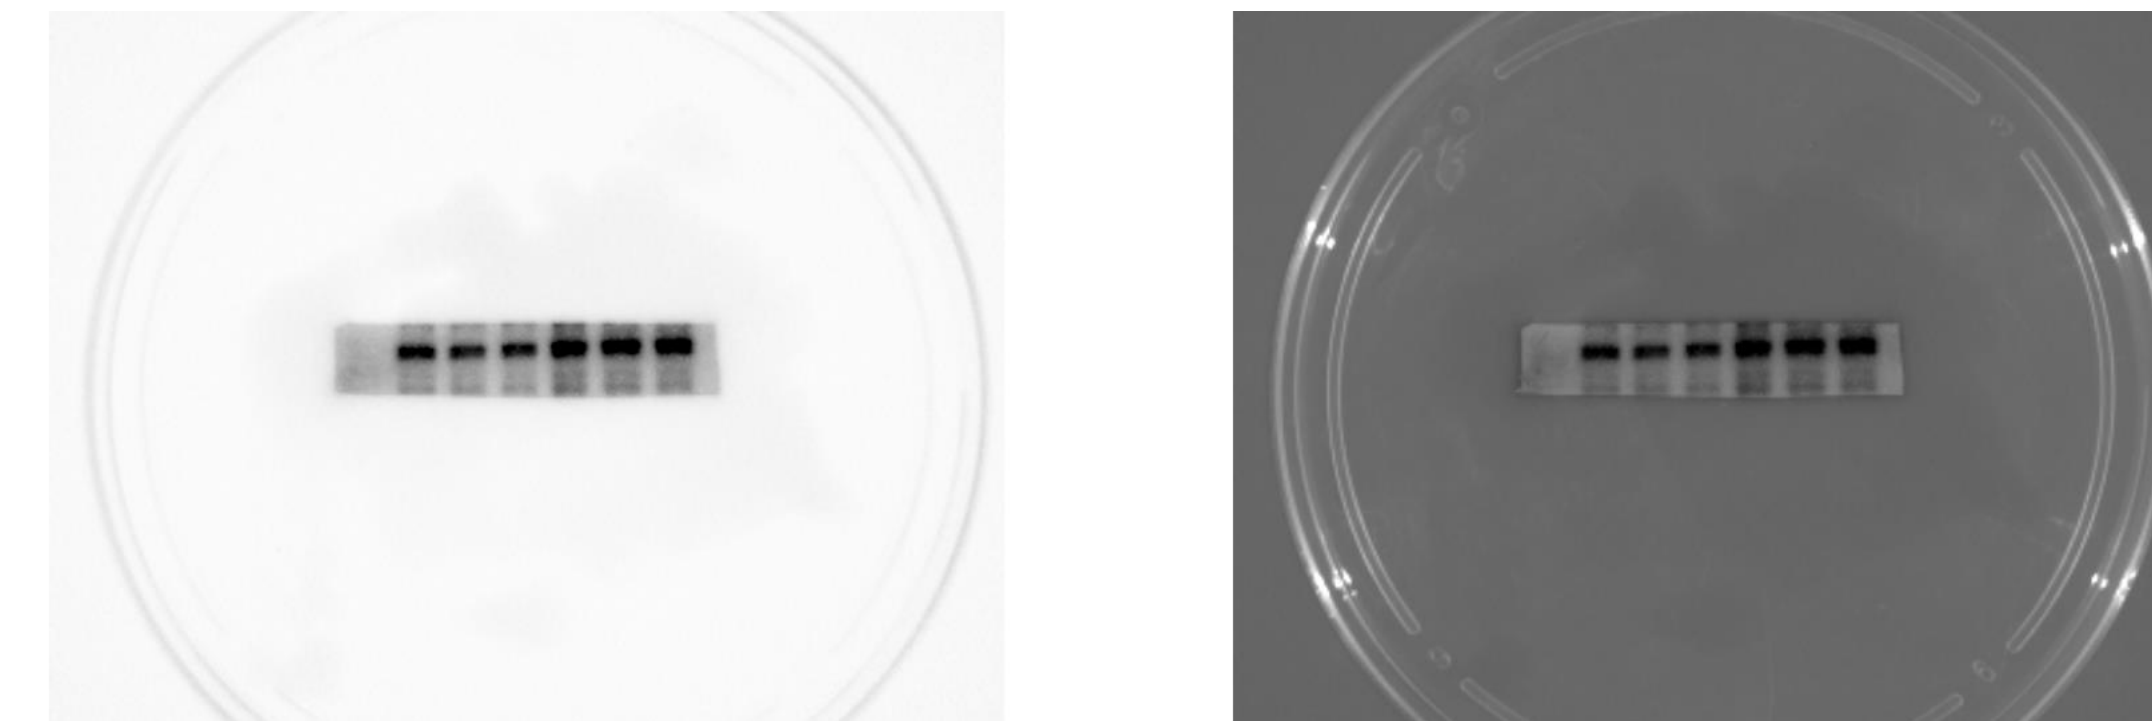

$\beta$ -actin

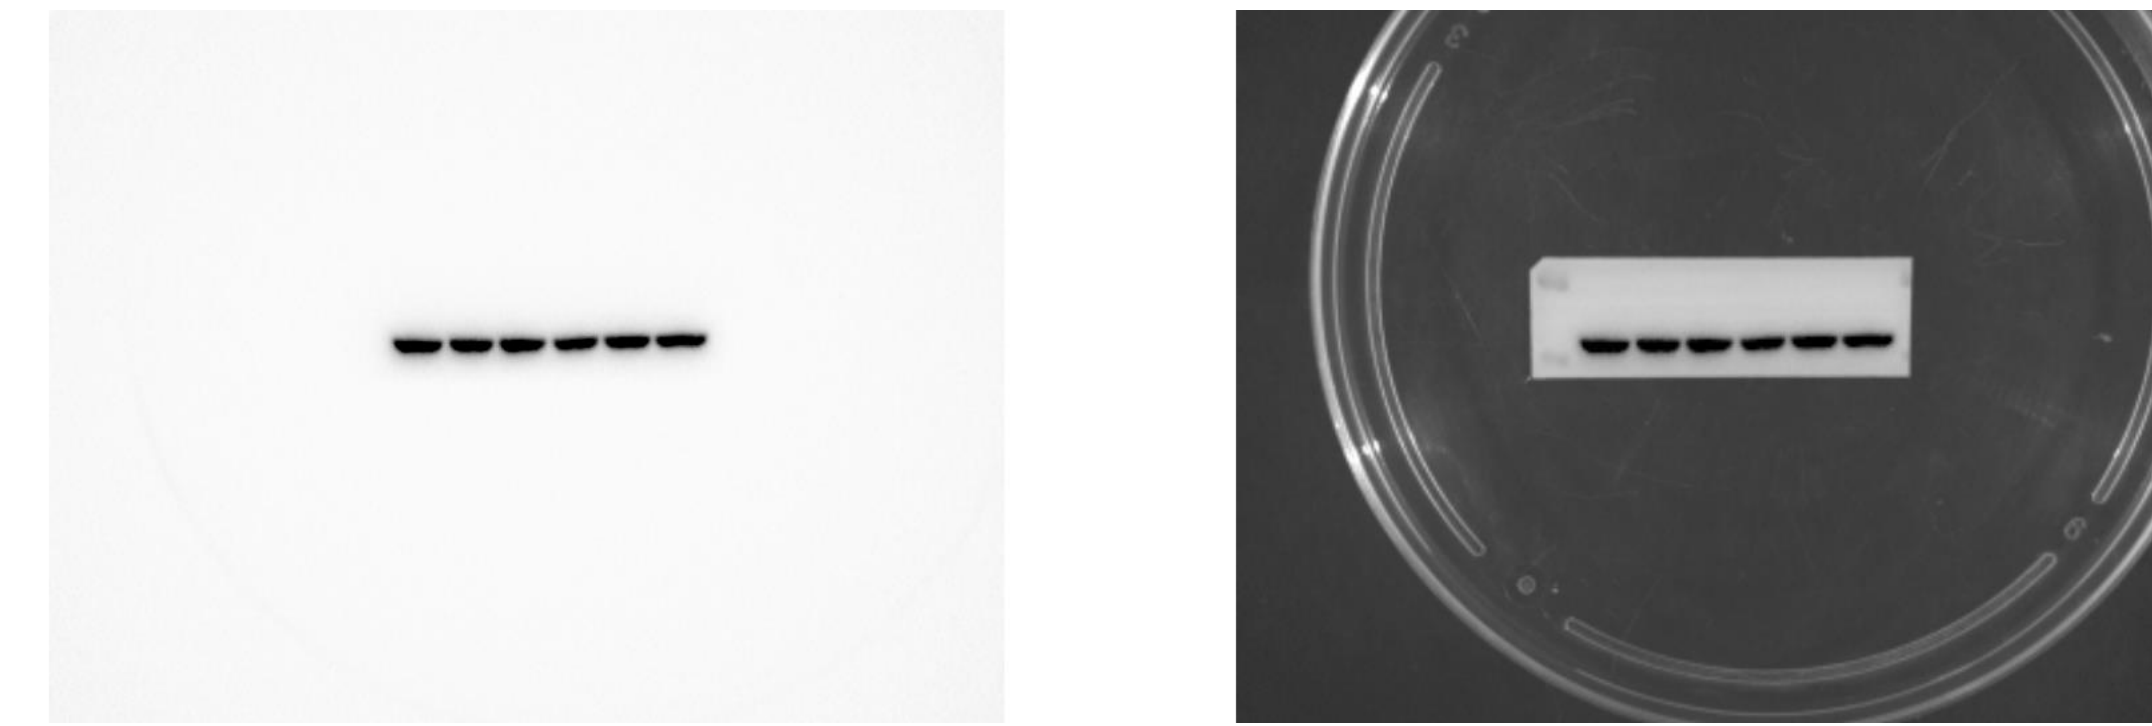

Figure 5. METTL3 is needed to maintain SOX5 expressing

sh-METTL3

Figure 5 (A)

METTL3

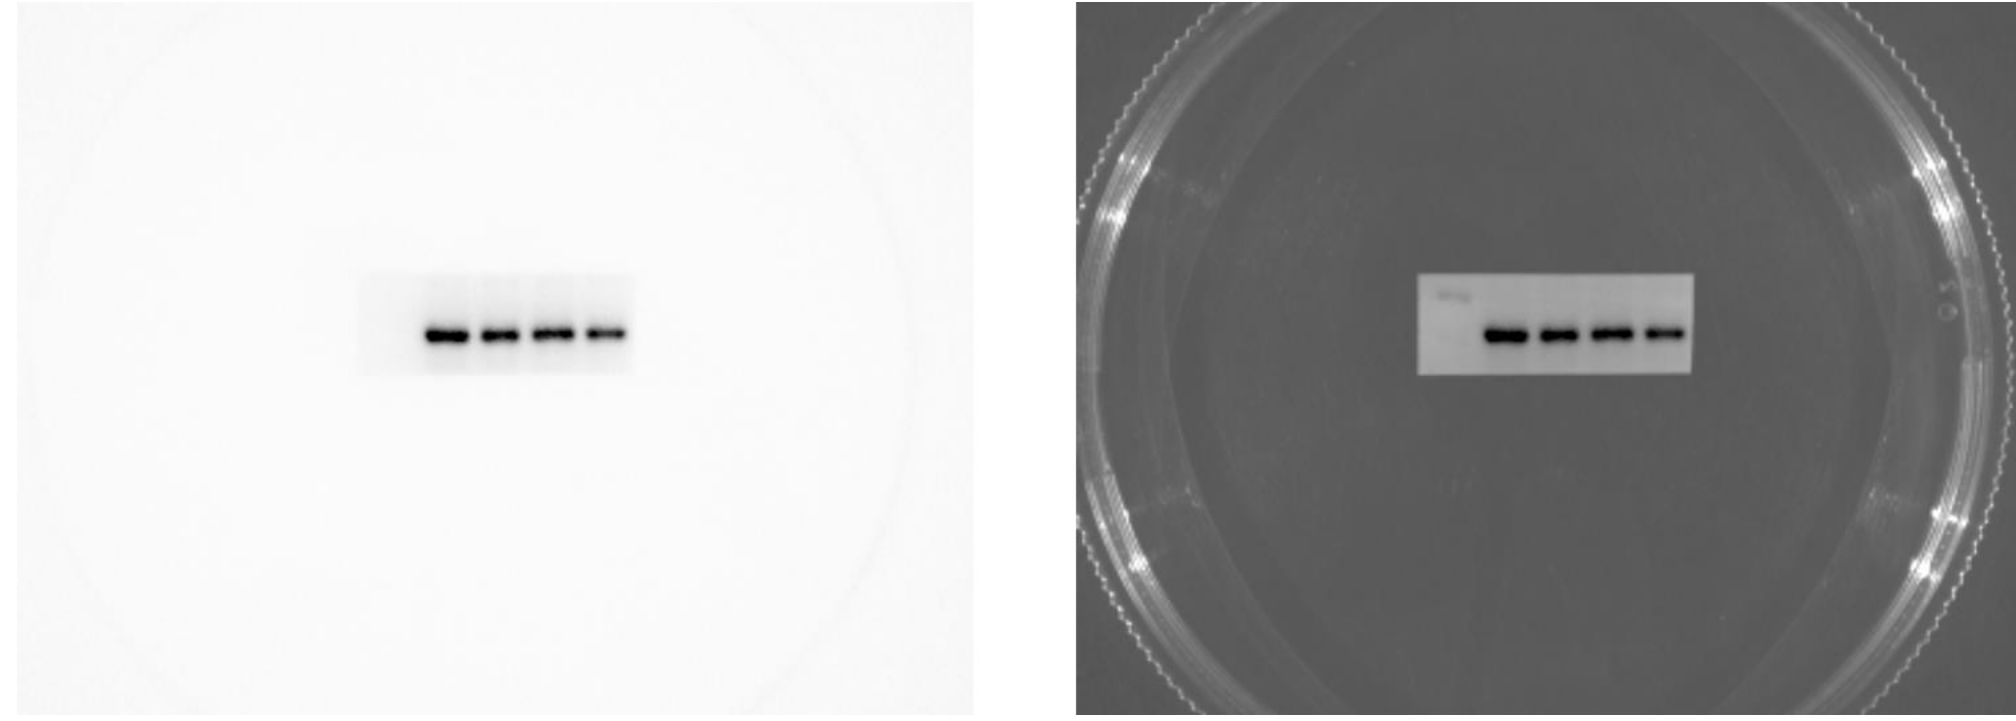

SOX5

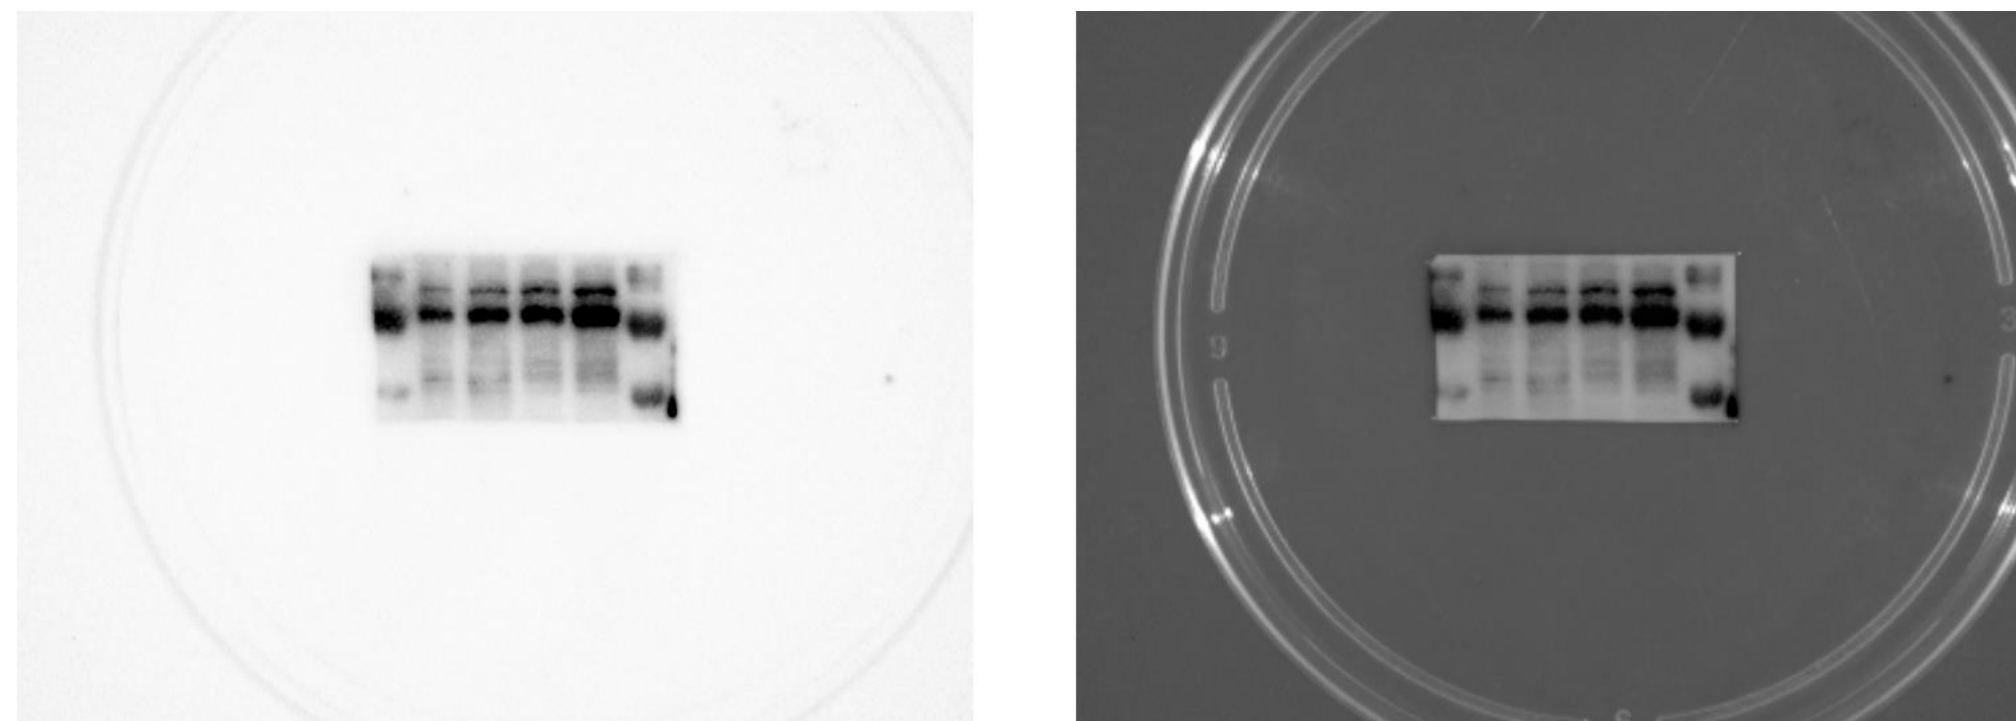

$\beta$ -actin

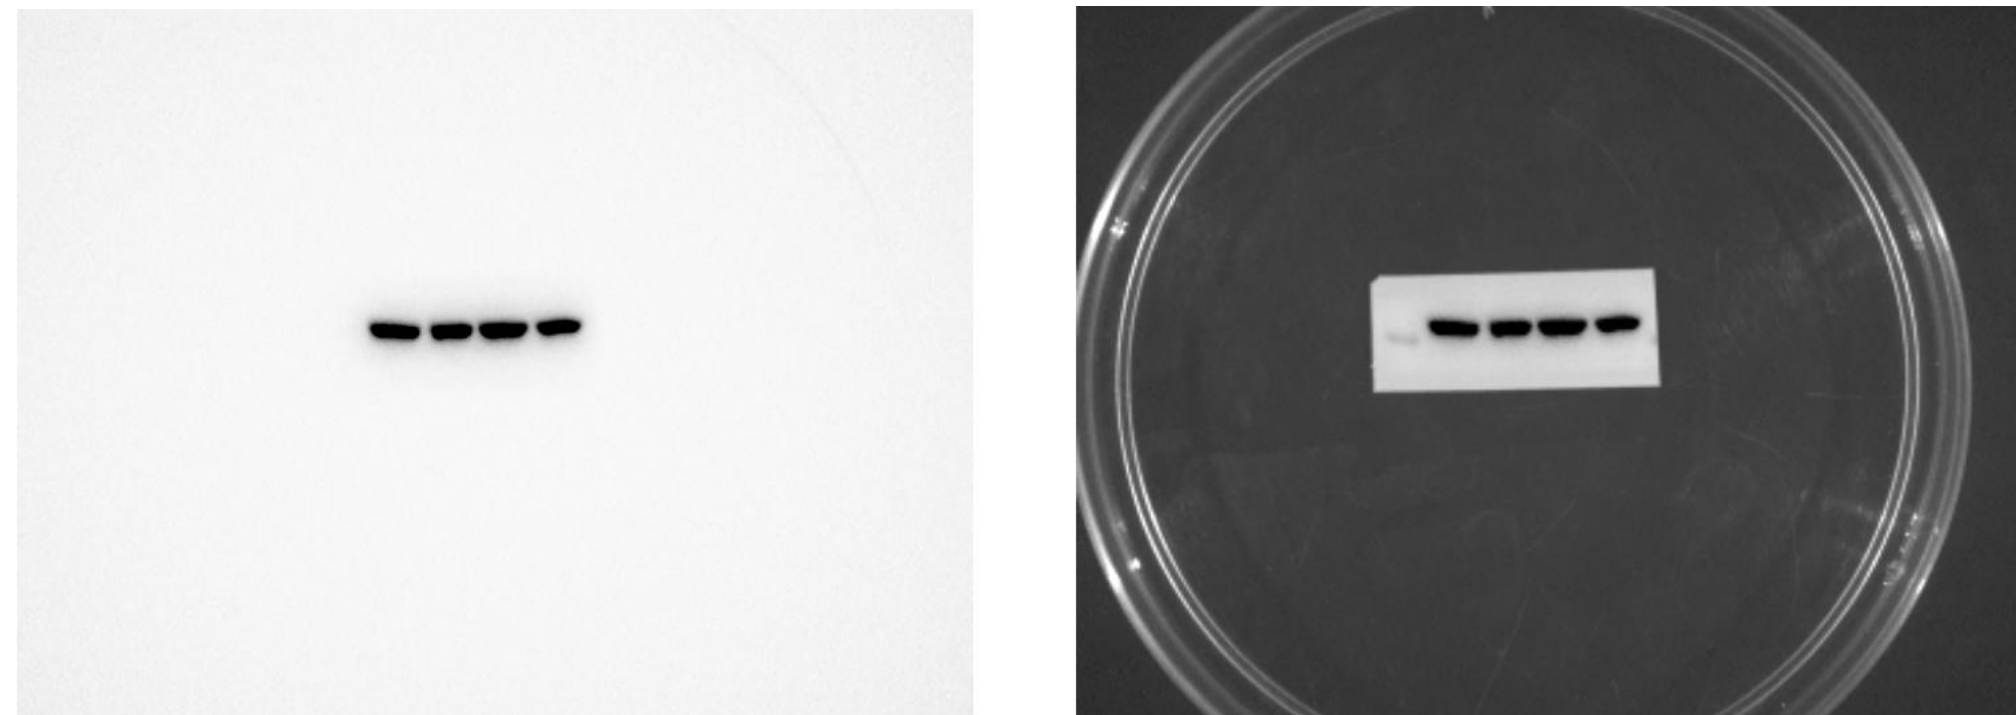

Figure 5. METTL3 is needed to maintain SOX5 expressing

OE-METTL3

Figure 5 (C)

METTL3

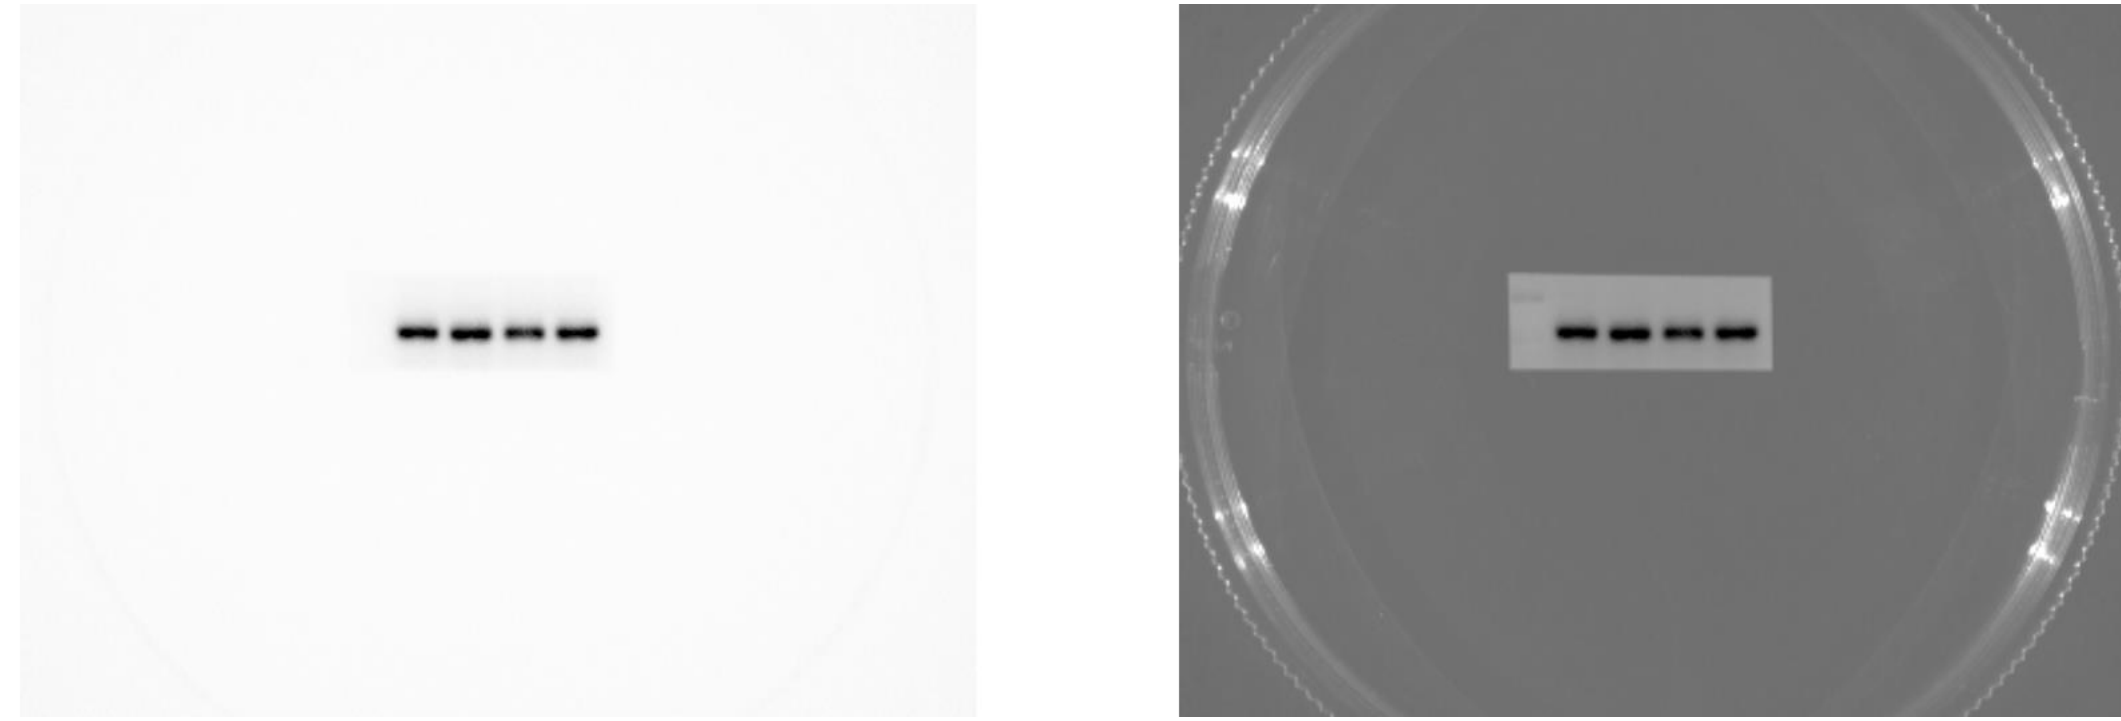

SOX5

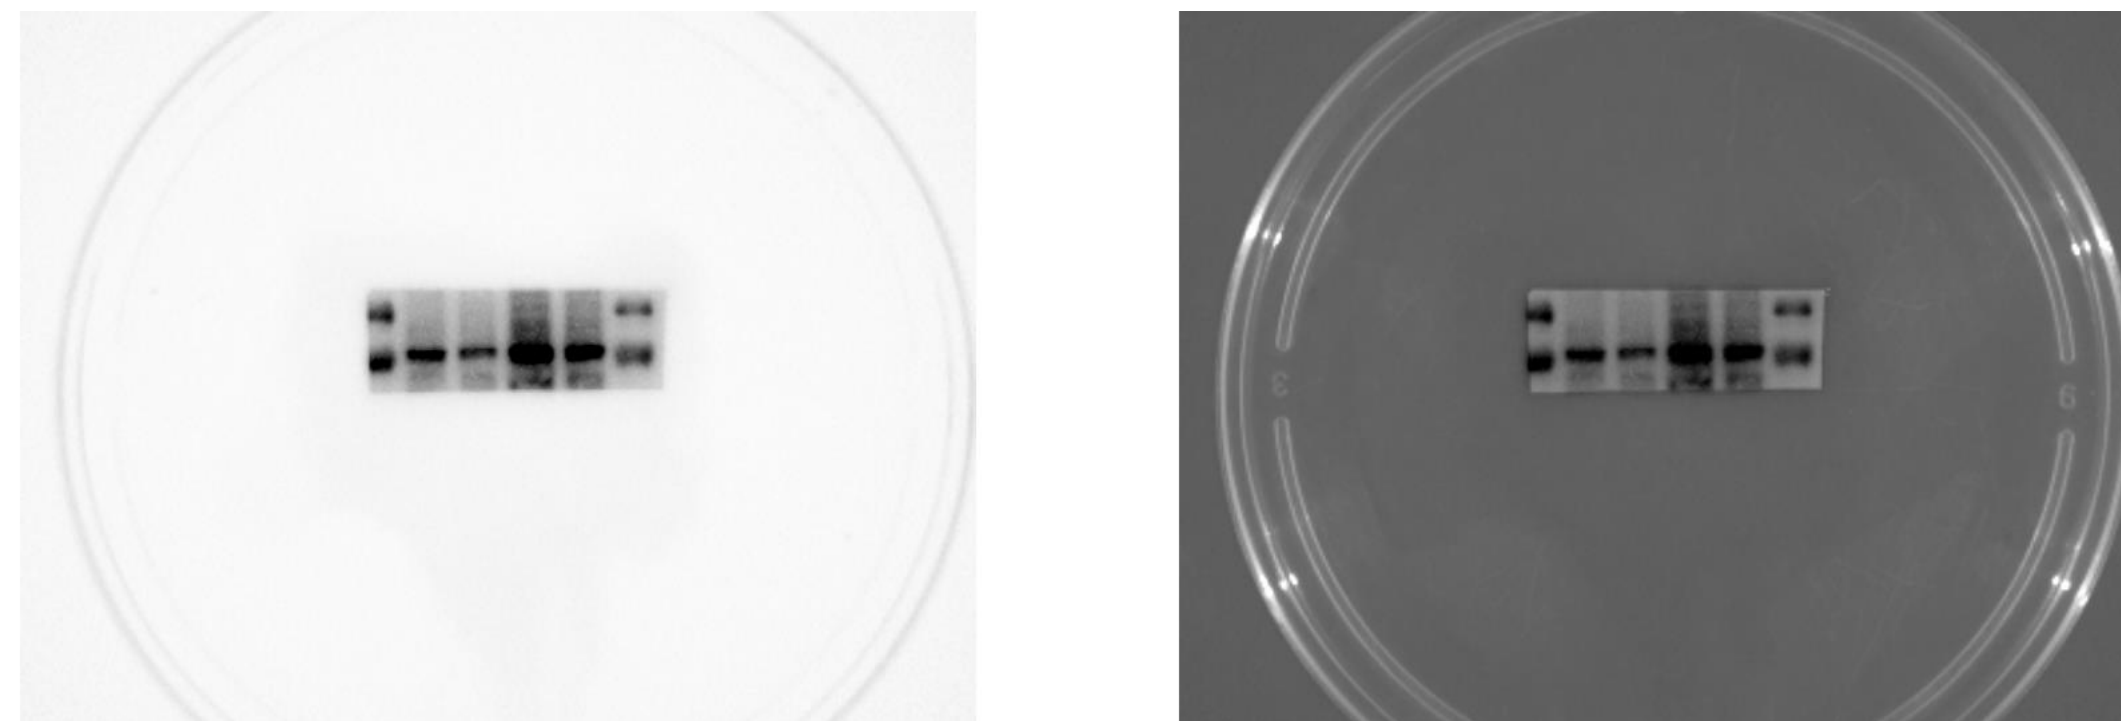

$\beta$ -actin

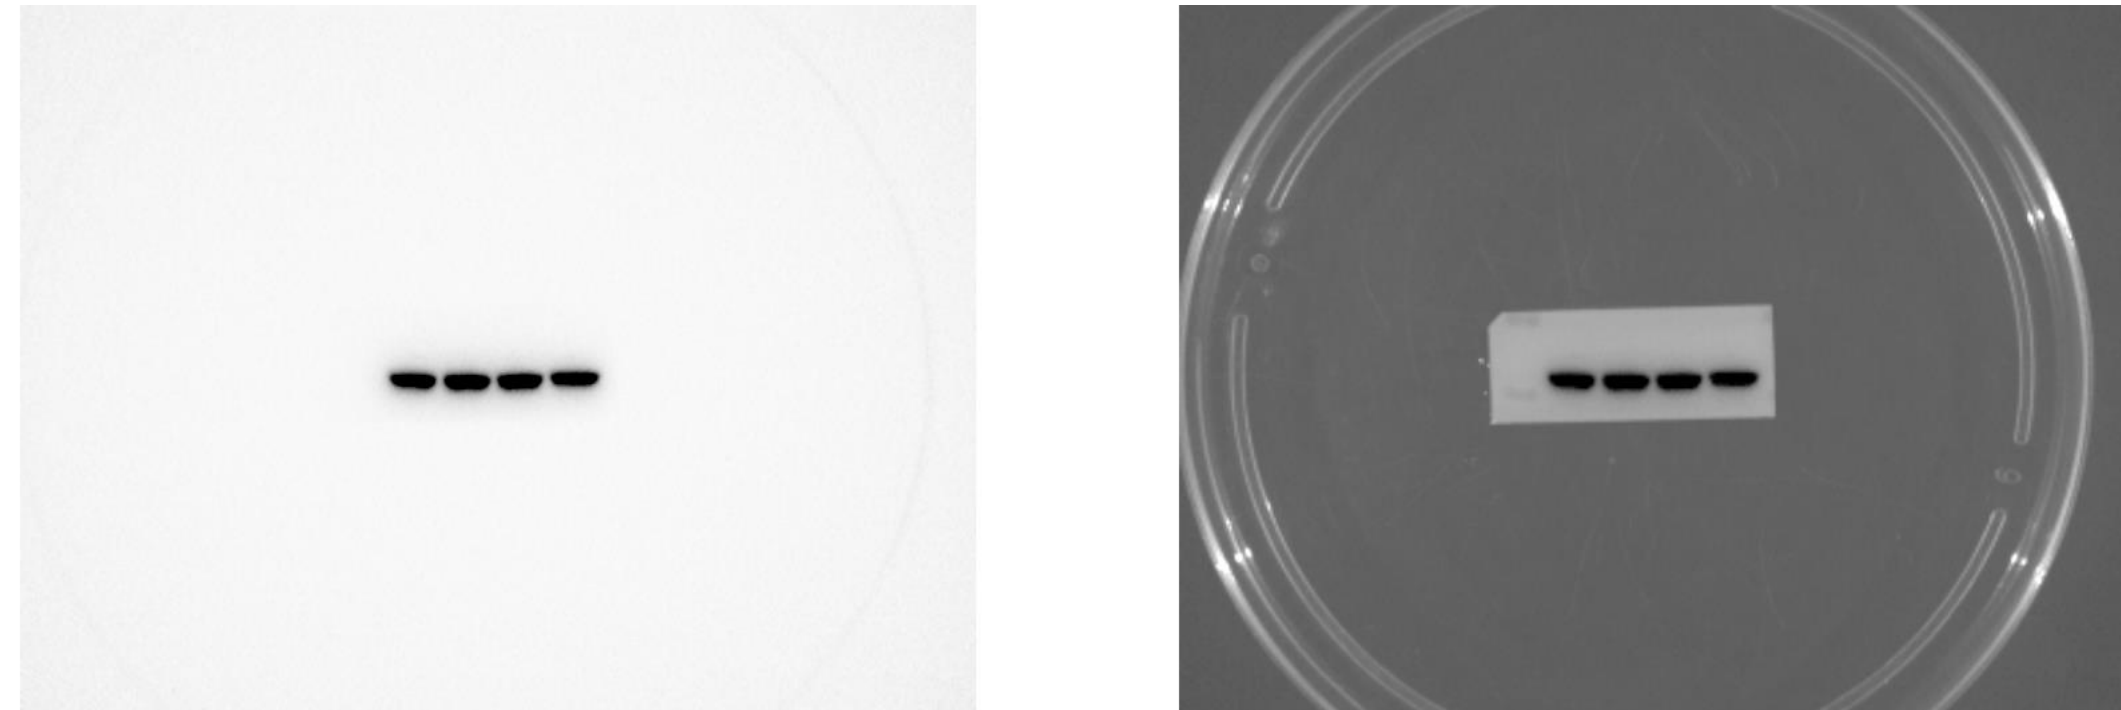

Figure 5. METTL3 is needed to maintain SOX5 expressing

sh-SOX5

Figure 5 (E)

METTL3

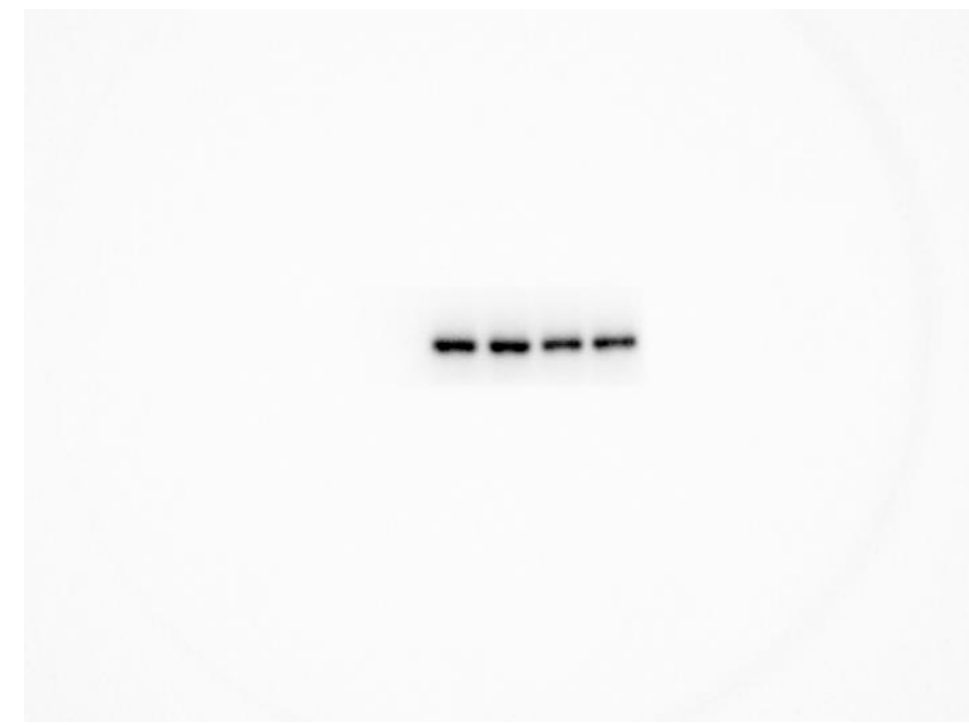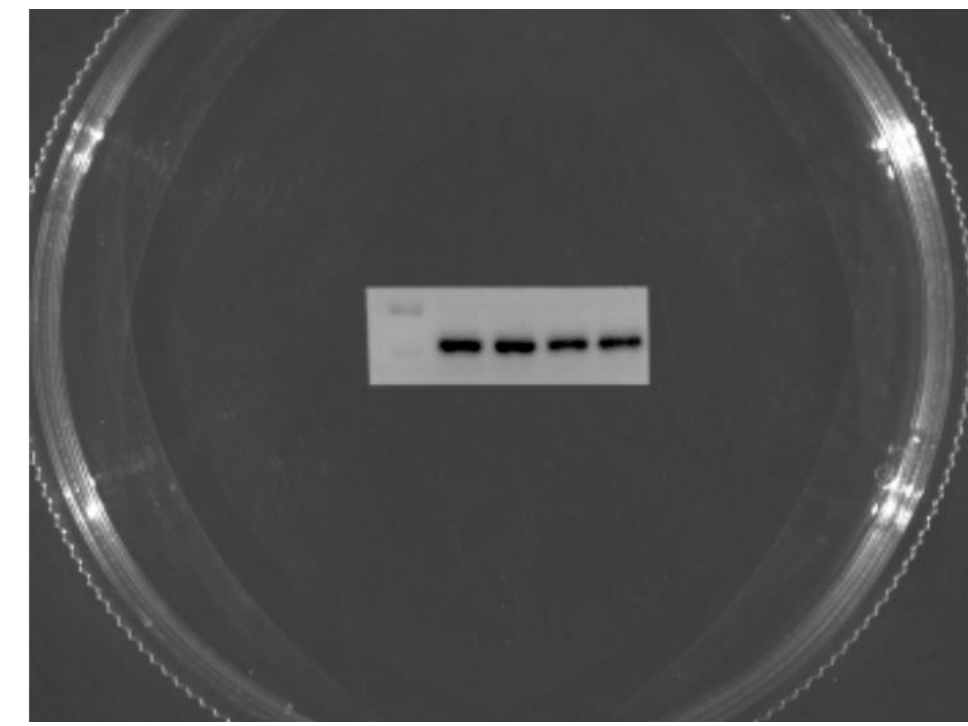

SOX5

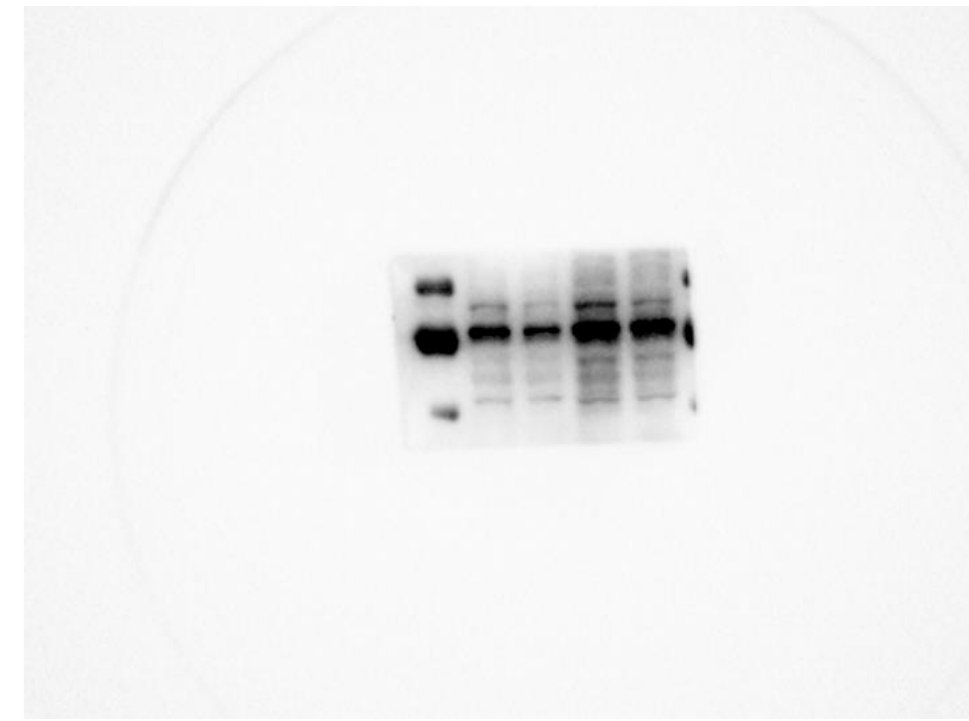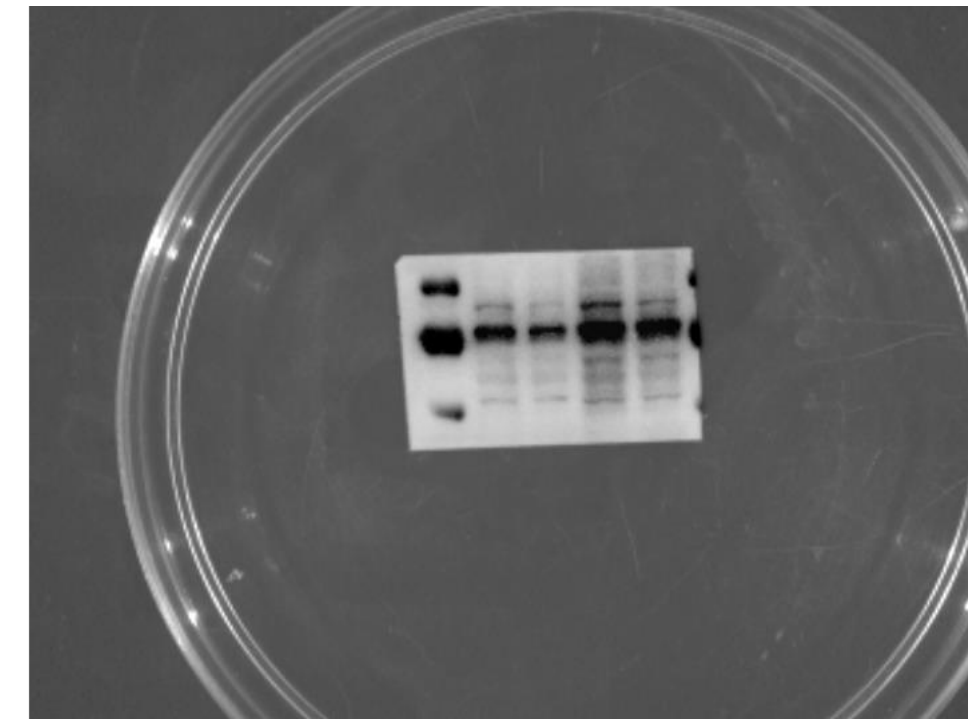

$\beta$ -actin

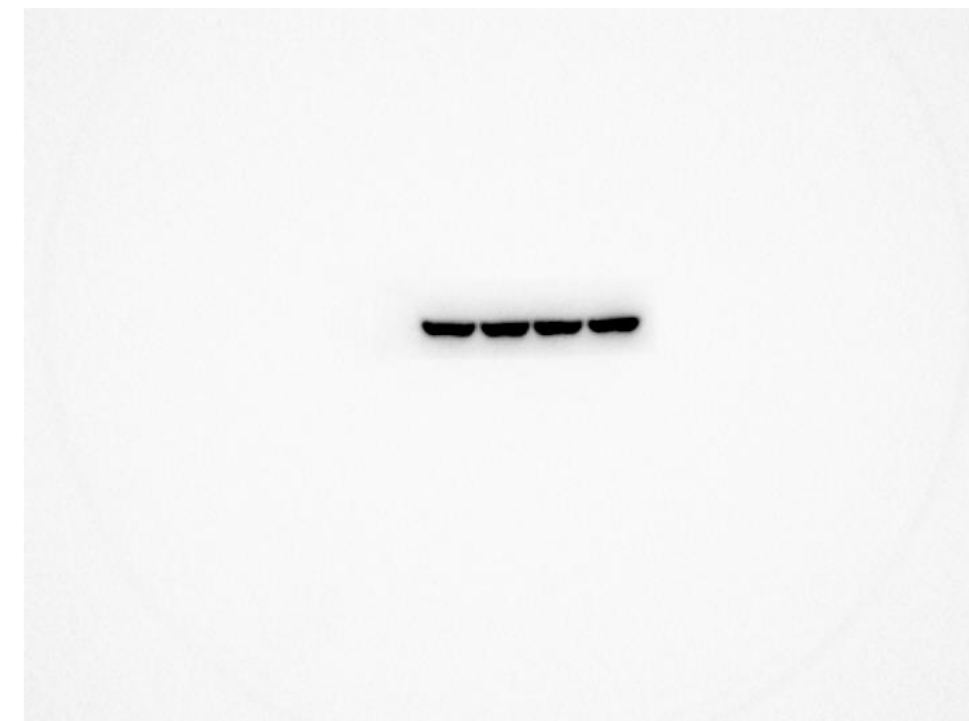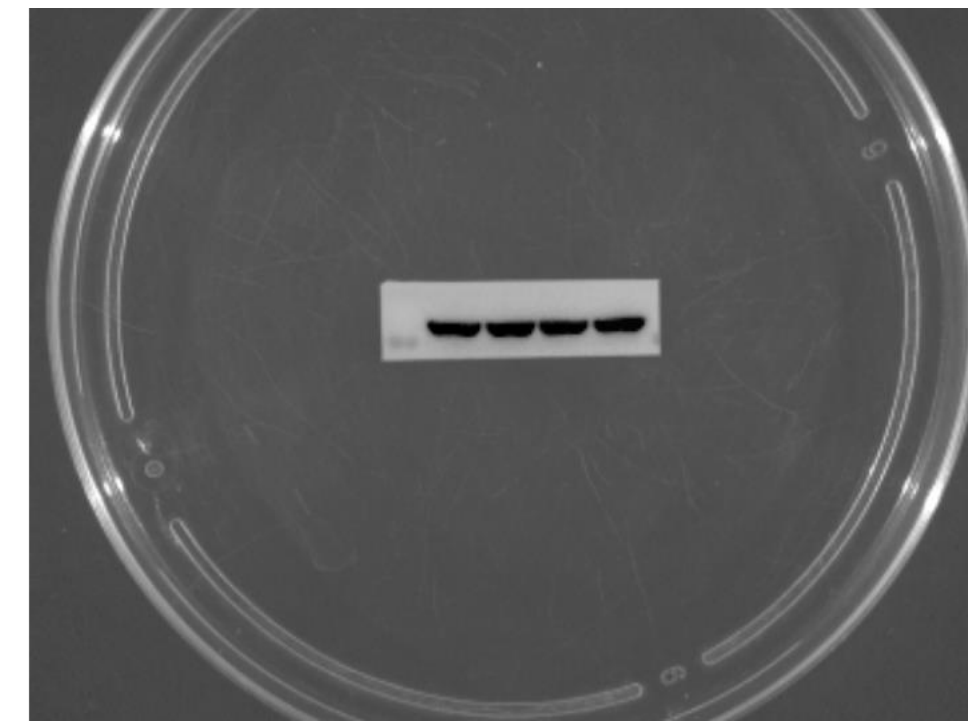

Figure 5. METTL3 is needed to maintain SOX5 expressing

OE-SOX5

Figure 5 (G)

METTL3

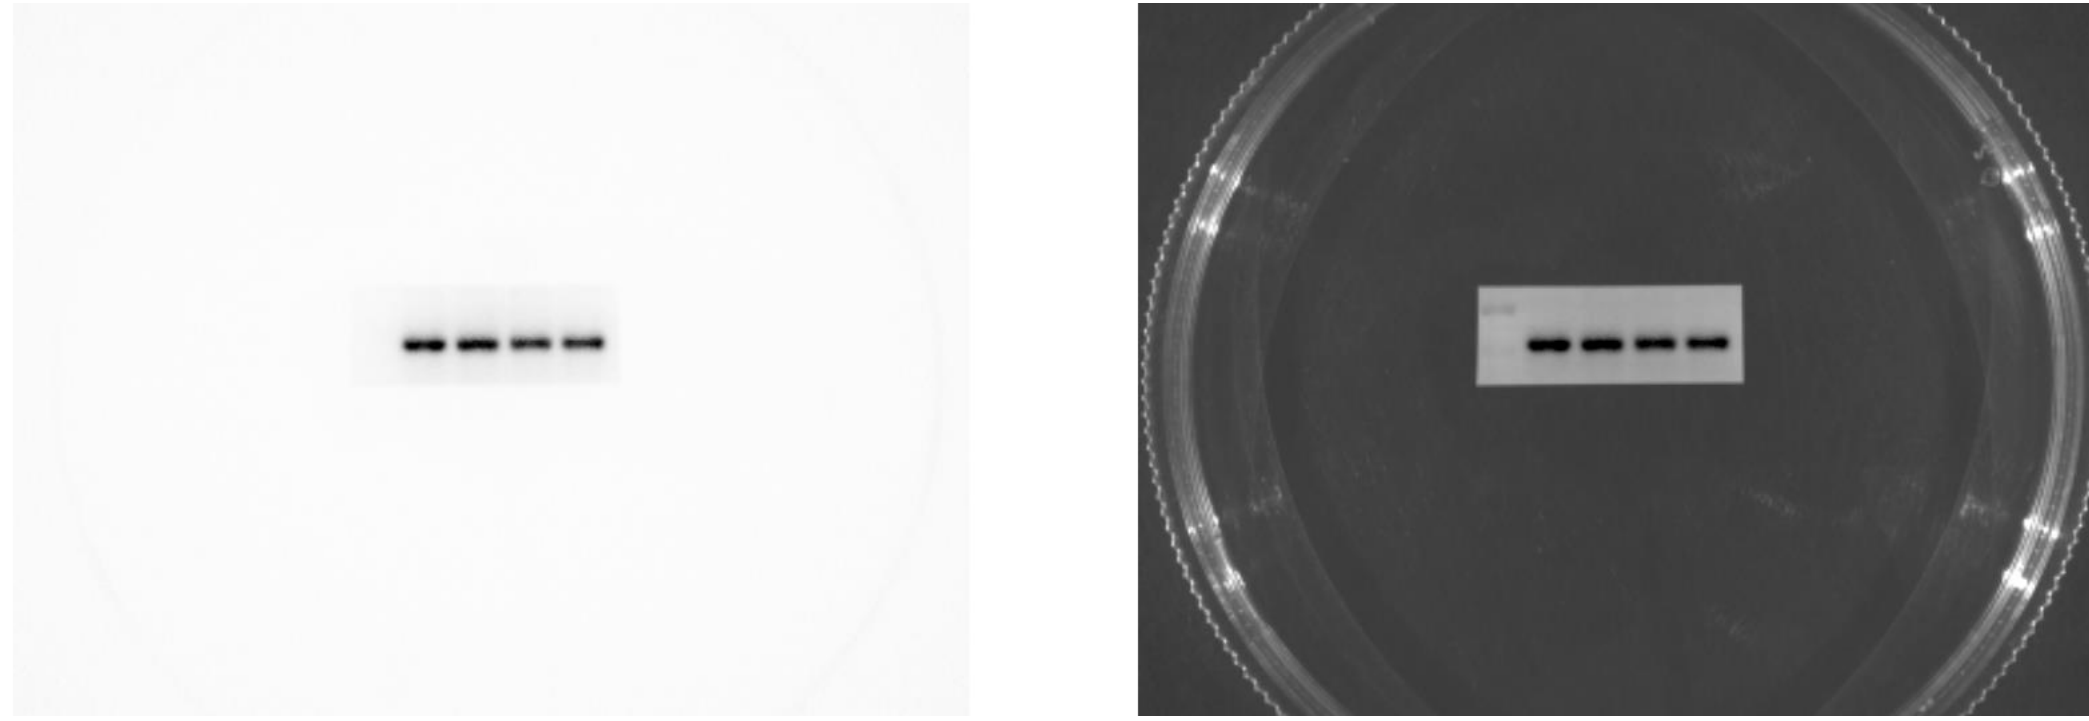

SOX5

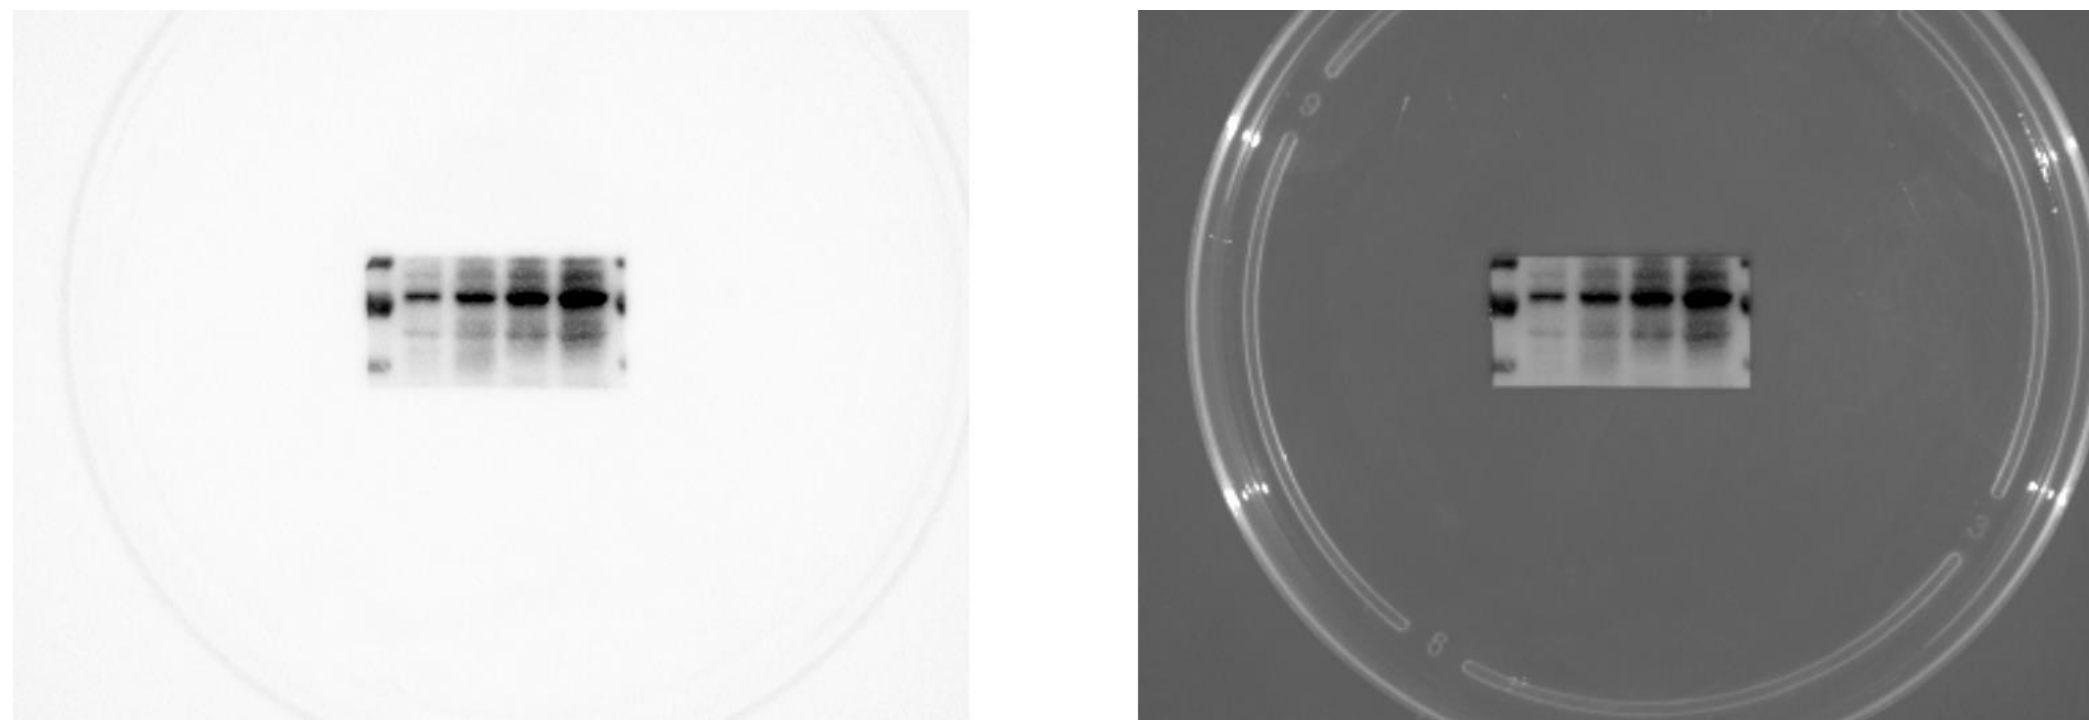

$\beta$ -actin

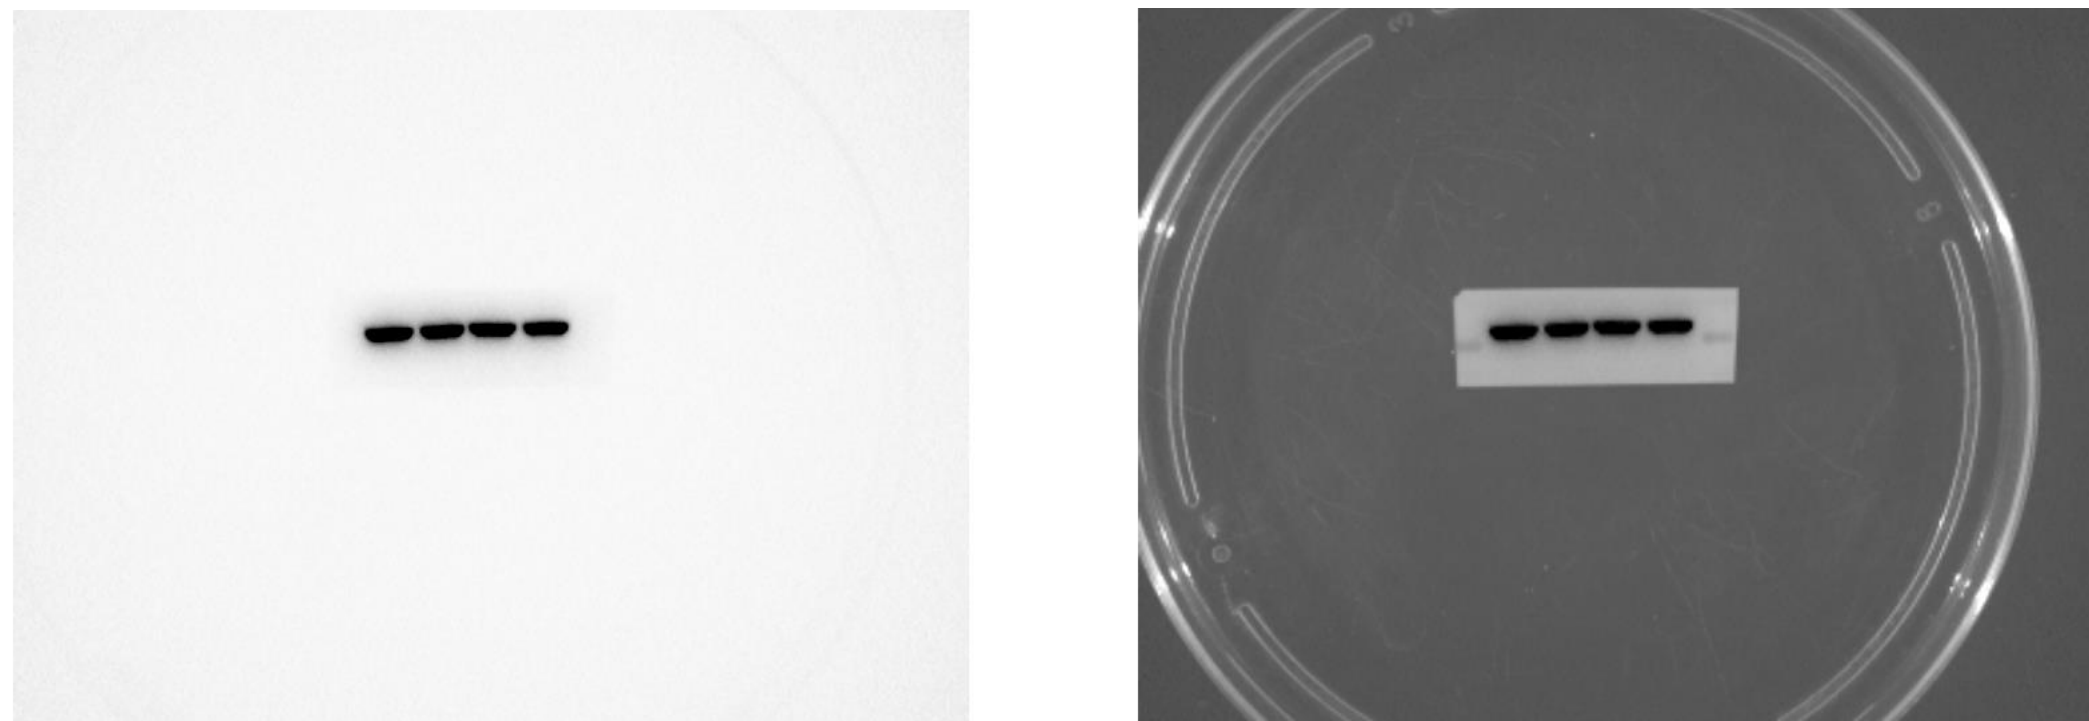

Figure 7. Silencing SOX5 could reverse the induced differentiation of Th2 cells by METTL3

Figure 7 (A)

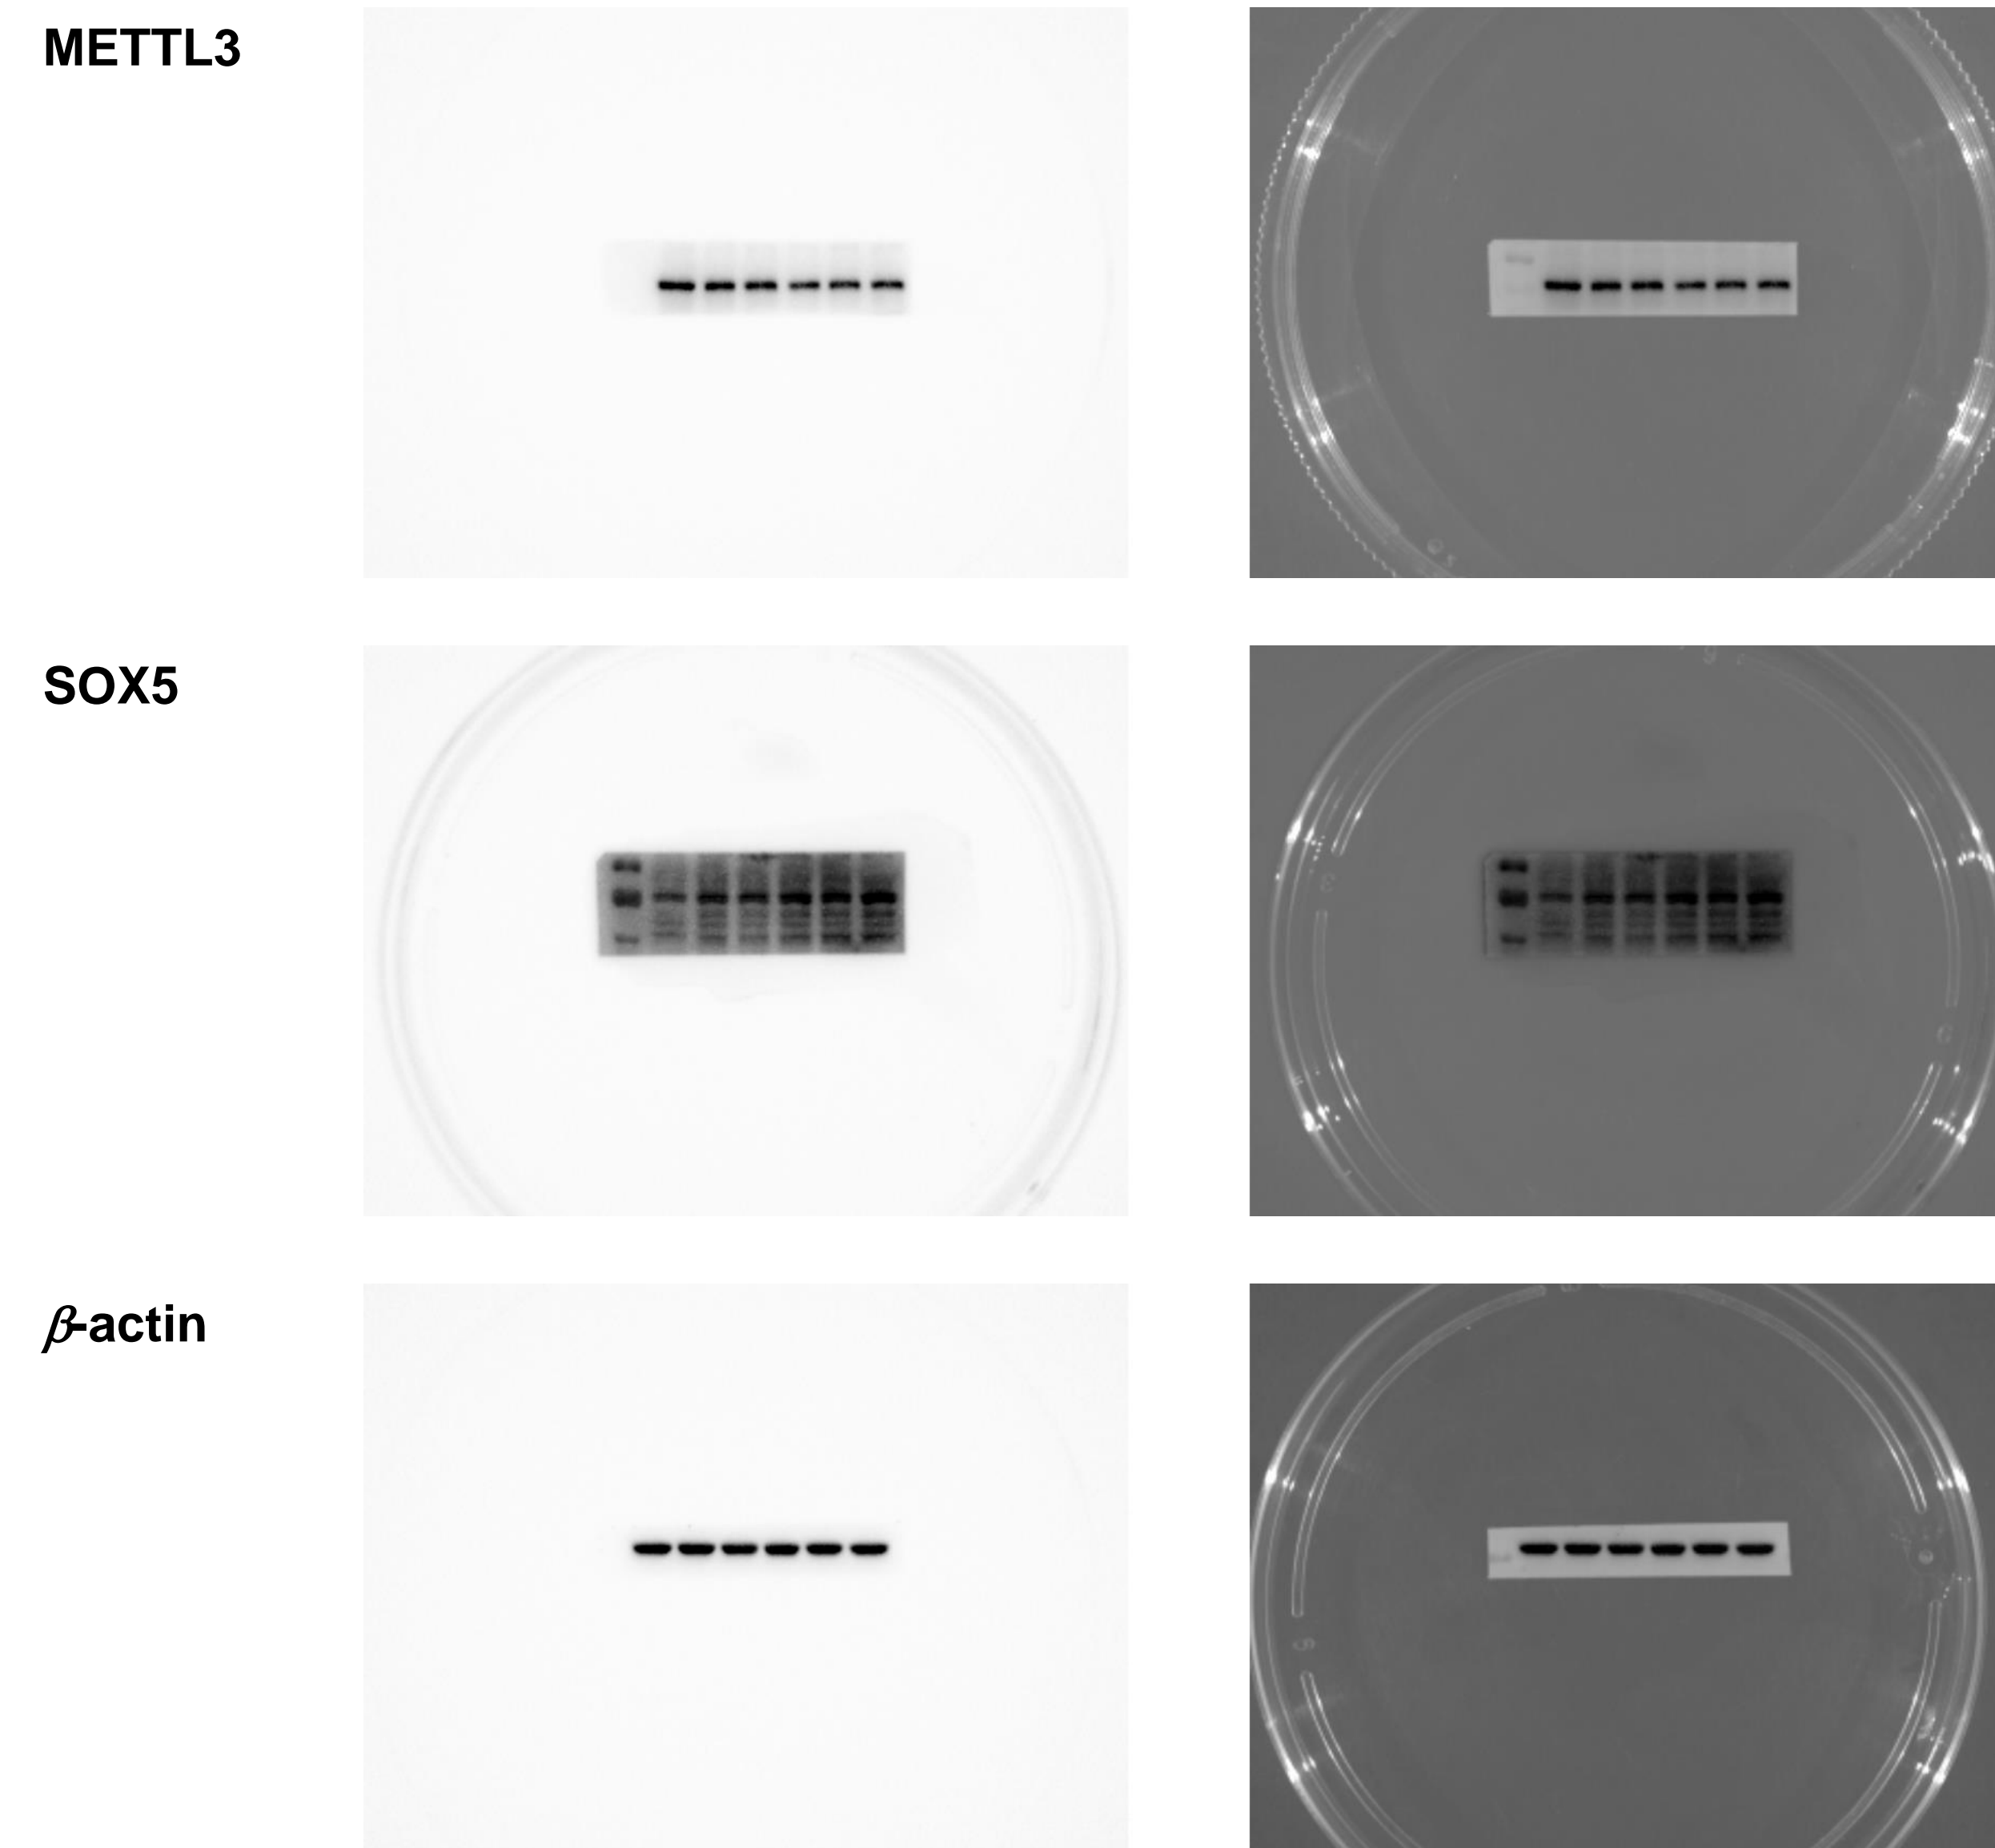

Supplement: mmc1.pdf [file mmc1.pdf]
